# Supplementary material for: Surface defect healing in annealing from nanoporous carbons to nanoporous graphenes
Source: Royal Society of Chemistry journal article supplement (doi:10.1039/d3cp04921c), 2023-01-01
Supplement: d3cp04921c1.pdf [file d3cp04921c1.pdf]

Electronic Supplementary Information for

**Surface Defect Healing in Annealing from Nanoporous Carbons to Nanoporous Graphenes**

Kaoru Yamazaki,<sup>\*,†</sup> Shunsuke Goto,<sup>‡</sup> Shunya Yoshino,<sup>‡</sup> Anna Gubarevich,<sup>¶</sup> Katsumi Yoshida,<sup>¶</sup> Hideki Kato,<sup>‡</sup> and Masanori Yamamoto<sup>\*,‡,§</sup>

<sup>‡</sup> *Institute of Multidisciplinary Research for Advanced Materials, Tohoku University, 2-1-1 Katahira, Aoba, Sendai 980-8577, Japan*

<sup>†</sup> *RIKEN Center for Advanced Photonics, RIKEN, 2-1 Hirosawa, Wako, Saitama 351-0198, Japan*

<sup>§</sup> *Department of Chemical Science and Engineering, Tokyo Institute of Technology, Ookayama 2-12-1, Meguro, Tokyo 152-8550, Japan*

<sup>¶</sup> *Institute of Innovative Research, Tokyo Institute of Technology, 2-12-1 Ookayama, Meguro, Tokyo 152-8550, Japan*

\*To whom correspondence should be addressed:

Email: [kaoru.yamazaki@riken.jp](mailto:kaoru.yamazaki@riken.jp); [yamamoto@mol-chem.com](mailto:yamamoto@mol-chem.com)

## Nitrogen Physisorption

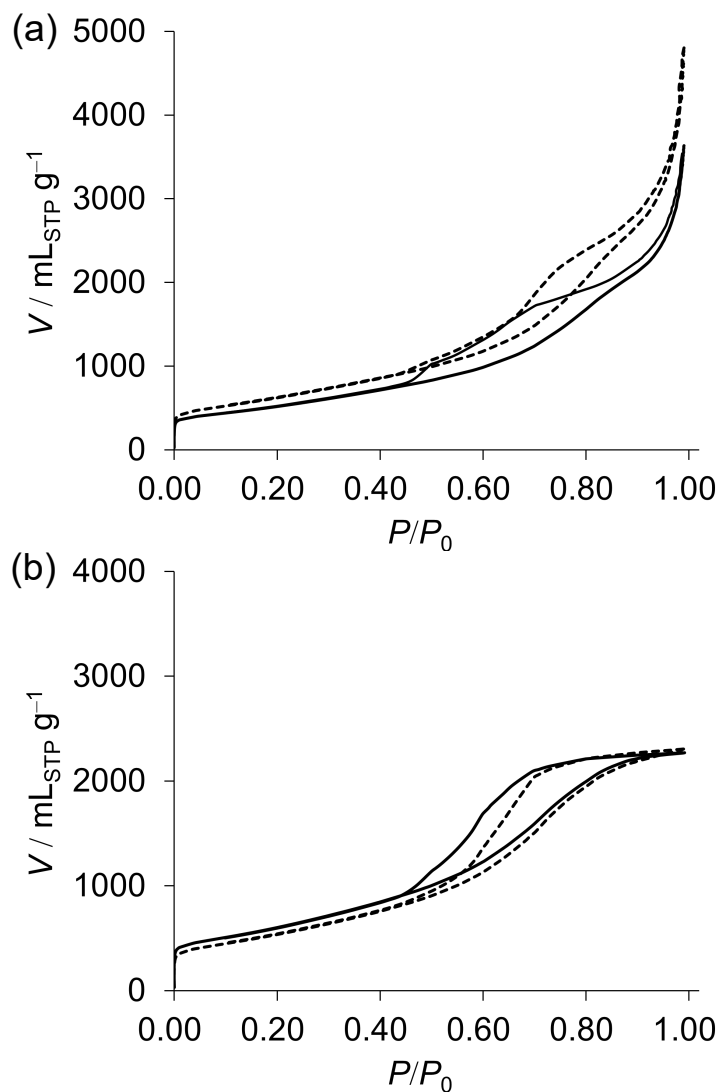

**Figure S1.**  $\text{N}_2$  physisorption at 77 K of **NPCs** (dashed line) and **NPGs** (solid line) obtained from (a)  $\theta\text{-Al}_2\text{O}_3$  and (b)  $\gamma\text{-Al}_2\text{O}_3$  as the templates.

## Temperature-Programmed Desorption

The amounts of H<sub>2</sub>, H<sub>2</sub>O, CO, and CO<sub>2</sub> evolved during the pyrolysis were quantified by TPD methods as previously reported.<sup>S2</sup>

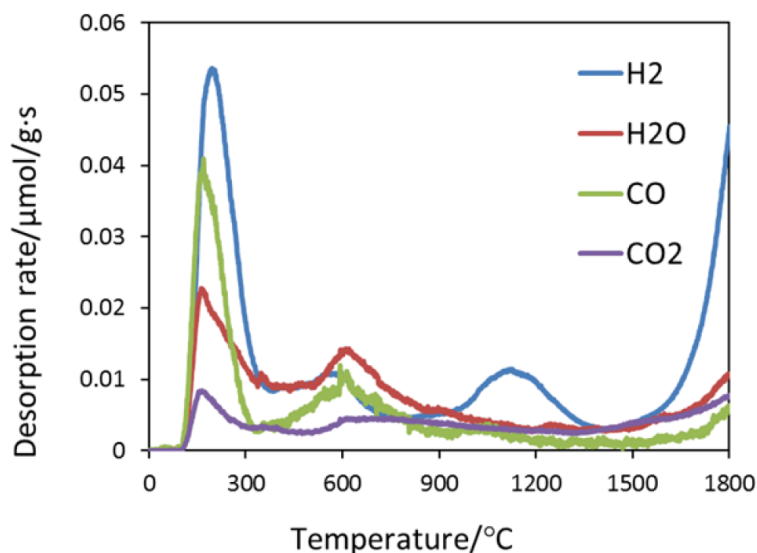

**Figure S2.** The representative TPD profile of NPG synthesized using  $\gamma$ -Al<sub>2</sub>O<sub>3</sub> as the template.

The defect density *per* hexagon based on the TPD  $\lambda_{\text{TPD}}$  in the SI unit was calculated with the total amount of evolved gases  $N_{\text{total}}$  in mol g<sup>-1</sup> including H<sub>2</sub>, CO, and CO<sub>2</sub>, and gravimetric surface area  $S_{\text{BET}}$  in m<sup>2</sup> g<sup>-1</sup> as,

$$\lambda_{\text{TPD}} = N_{\text{total}} / S_{\text{BET}} \text{ [mol m}^{-2}\text{]} \quad (\text{S1})$$

We can convert the SI unit-based  $\lambda_{\text{TPD}}$  to molecule-based  $\lambda_{\text{TPD}}$  by multiplying the specific area of a graphene hexagon  $S_{\text{h}}$  and Avogadro constant  $N_{\text{A}}$  ( $6.022 \times 10^{23}$  mol<sup>-1</sup>) as,

$$\lambda_{\text{TPD}} = N_{\text{total}} N_{\text{A}} S_{\text{h}} / S_{\text{BET}} \text{ [per hexagon]} \quad (\text{S2})$$

where  $S_{\text{h}} = 0.0523 \times 10^{-18}$  m<sup>2</sup> is calculated using the C=C bond length (0.142 nm) in the hexagons. The obtained  $\lambda_{\text{TPD}}$  values based on Eq. S2 are listed in Table 1 of the manuscript.

## Thermogravimetric Analysis

Thermogravimetric analysis (TGA) of the carbon/alumina composites was conducted using a thermogravimeter (Shimadzu, DTG-60H) operating from 300 to 1173 K at a rate of 10 K min<sup>-1</sup> under a steady flow of air (50 mL min<sup>-1</sup>).

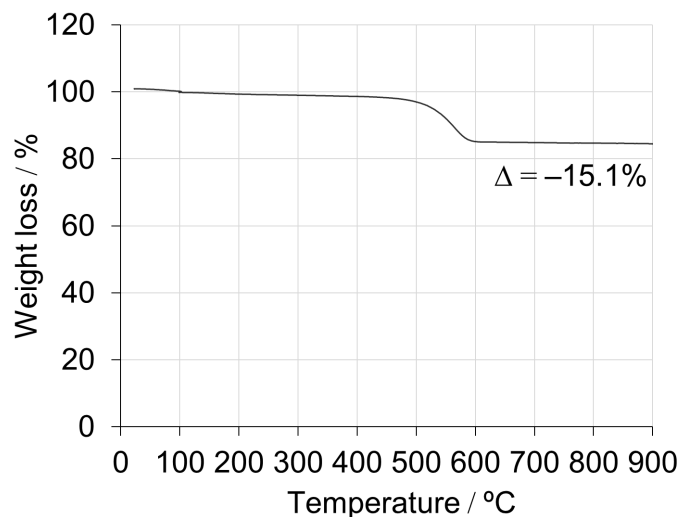

**Figure S3.** TG profile of the NPC/ $\gamma$ -alumina (SBa-200) composite under a steady flow of synthetic air, showing 15.1% of decrease at 650 °C.

The number of the graphene layers  $n_{\text{gra}}$  was estimated using the gravimetric surface area of graphene  $S_{\text{gra}}$ , gravimetric surface area of a template  $S_{\text{templ}}$ , an experimentally obtained weight ratio of carbon deposited onto the surface of a template  $w_{\text{exp}}$ , and the theoretical weight ratio of single-layered carbon  $w_{\text{gra}}$  as,<sup>S1</sup>

$$w_{\text{gra}} = \frac{\left(\frac{S_{\text{gra}}}{2}\right)^{-1}}{S_{\text{templ}}^{-1} + \left(\frac{S_{\text{gra}}}{2}\right)^{-1}} \quad (\text{S3})$$

$$n_{\text{gra}} = \frac{w_{\text{exp}}}{w_{\text{gra}}} \quad (\text{S4})$$

Eq. S3 gave  $w_{\text{gra}} = 13.4$  wt% for  $\gamma$ -Al<sub>2</sub>O<sub>3</sub> (SBa-200) by using  $S_{\text{templ}} = S_{\text{BET}} = 203$  m<sup>2</sup> g<sup>-1</sup> from N<sub>2</sub> physisorption experiment, and  $S_{\text{gra}} = 2627$  m<sup>2</sup> g<sup>-1</sup> evaluated by assuming that the carbons in graphene are planarly arranged as hexagons and that the C=C bond length is 0.142 nm. The resultant value of  $w_{\text{gra}}$  is in agreement with that from N<sub>2</sub> physisorption (15.1 wt%, Figure S3).  $n_{\text{gra}}$  was finally calculated to be 1.1 for NPC/NPG synthesized using  $\gamma$ -Al<sub>2</sub>O<sub>3</sub> (SBa-200) from Eq. S4.

## Raman Spectroscopy

**Table S1.** Assignments, peak positions  $\varepsilon_i$ , Lorentzian linewidths in HWHM  $\Gamma_i$ , and phonon lifetime  $\tau_i$  for **NPCs** and **NPGs** synthesized with  $\theta$ - and  $\gamma$ -Al<sub>2</sub>O<sub>3</sub>.  $\tau_i$  was estimated by  $\tau_i = \hbar/\Gamma_i$ .

| Entry                                        | Assignment              | $\varepsilon_i/\text{cm}^{-1}$ | $\Gamma_i/\text{cm}^{-1}$ | $\tau_i/\text{fs}$ | Entry                                        | Assignment | $\varepsilon_i/\text{cm}^{-1}$ | $\Gamma_i/\text{cm}^{-1}$ | $\tau_i/\text{fs}$ |
|----------------------------------------------|-------------------------|--------------------------------|---------------------------|--------------------|----------------------------------------------|------------|--------------------------------|---------------------------|--------------------|
| <b>NPC</b>                                   | SW                      | 1163                           | 86                        | 62                 | <b>NPC</b>                                   | SW         | 1170                           | 47                        | 113                |
| ( $\theta$ -Al <sub>2</sub> O <sub>3</sub> ) | D                       | 1328                           | 32                        | 168                | ( $\gamma$ -Al <sub>2</sub> O <sub>3</sub> ) | D          | 1337                           | 25                        | 211                |
|                                              | G                       | 1577                           | 31                        | 171                |                                              | G          | 1589                           | 24                        | 221                |
|                                              | D'                      | 1603                           | 13                        | 406                |                                              | D'         | 1617                           | 10                        | 532                |
|                                              | SW+D                    | 2454                           | 38                        | 141                |                                              | SW+D       | 2480                           | 40                        | 134                |
|                                              | Background <sup>a</sup> | 2634                           | 359                       | 15                 |                                              | Background | ---                            | ---                       | ---                |
|                                              | G'                      | 2651                           | 56                        | 95                 |                                              | G'         | 2659                           | 47                        | 113                |
|                                              | D+G                     | 2909                           | 58                        | 91                 |                                              | D+G        | 2919                           | 55                        | 96                 |
|                                              | 2D'                     | 3195                           | 47                        | 112                |                                              | 2D'        | 3208                           | 58                        | 91                 |
| <b>NPG</b>                                   | SW                      | 1113                           | 52                        | 102                | <b>NPG</b>                                   | SW         | 1122                           | 42                        | 127                |
| ( $\theta$ -Al <sub>2</sub> O <sub>3</sub> ) | D                       | 1330                           | 21                        | 257                | ( $\gamma$ -Al <sub>2</sub> O <sub>3</sub> ) | D          | 1338                           | 16                        | 322                |
|                                              | G                       | 1575                           | 22                        | 239                |                                              | G          | 1583                           | 17                        | 315                |
|                                              | D'                      | 1611                           | 12                        | 436                |                                              | D'         | 1619                           | 8                         | 658                |
|                                              | SW+D                    | 2444                           | 26                        | 202                |                                              | SW+D       | 2455                           | 30                        | 177                |
|                                              | G'                      | 2653                           | 35                        | 150                |                                              | G'         | 2663                           | 31                        | 174                |
|                                              | D+G                     | 2914                           | 40                        | 134                |                                              | D+G        | 2923                           | 40                        | 134                |

<sup>a</sup> The broad peak at 2634 cm<sup>-1</sup> ( $\Gamma_i = 359$  cm<sup>-1</sup>) for **NPC** ( $\theta$ -Al<sub>2</sub>O<sub>3</sub>) could be the remaining background which cannot be expressed by the polynomial background function.

We also measured the Raman spectrum of zeolite-templated carbon (ZTC) using Y-zeolite (ZTC (Y)) to rationalize the structure and defect density of **NPCs** as shown in Figure S4c. We found that ZTC (Y) contains highly defective graphitized domains. The G band at 1555 cm<sup>-1</sup> and G' band at 2664 cm<sup>-1</sup> (Table S2) reveals the existence of graphitized domains. The lack of the D' bands and broader line-widths of observed bands than those of **NPCs** (Table S1) suggest that the graphitized domains of ZTC (Y) is highly defective. The  $I_D/I_G = 0.74$  results in the mean distance between defects in ZTC (Y)  $R_{ZTC} = 0.2$  nm according to eq. (2) (Table 1). This matches well with  $\lambda_{\text{Raman}} = 1.1$ , which means every hexagonal ring has one defect and 45–65 times more defective than **NPCs**. Multiple defects as well as single defects exist in ZTC (Y). According to Eq. 4, only  $P_0 = 34\%$  of hexagonal rings in ZTC (Y) remains non-defective while  $P_0 = 98\%$  of hexagonal rings in **NPCs** are pristine.  $P_n$  ( $n = 1,2,3,4$ ) of ZTC (Y) were calculated to be 36, 20, 7, and 2%, respectively, as shown in Figure 4. This defective nature of ZTC (Y) may come from the lower reaction temperature (800 °C) than those of **NPCs** (900 °C).

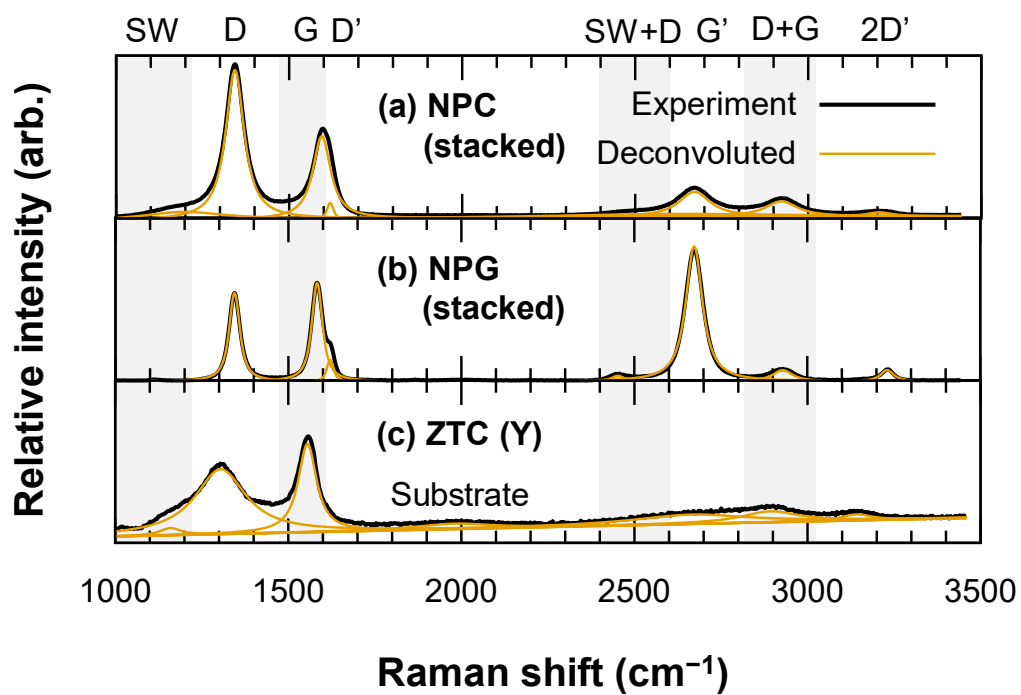

**Figure S4.** Experimental (black) and deconvoluted Raman spectra (with the polynomial background) of (a) **NPC** (stacked), (b) **NPG** (stacked), and (c) **ZTC** (Y). All measurements were performed at 2.33 eV (532 nm).

**Table S2.** Assignments, peak positions  $\varepsilon_i$ , Lorentzian linewidths in HWHM  $\Gamma_i$ , and phonon lifetime  $\tau_i$  for **NPC** and **NPG**, and ZTC synthesized with the Y zeolite template.  $\tau_i$  was estimated by  $\tau_i = \hbar/\Gamma_i$ .

| Entry                     | Assignment              | $\varepsilon_i / \text{cm}^{-1}$ | $\Gamma_i / \text{cm}^{-1}$ | $\tau_i / \text{fs}$ |
|---------------------------|-------------------------|----------------------------------|-----------------------------|----------------------|
| <b>NPC</b><br>(stacked)   | SW                      | 1195                             | 148                         | 36                   |
|                           | D                       | 1343                             | 31                          | 174                  |
|                           | G                       | 1594                             | 30                          | 179                  |
|                           | D'                      | 1619                             | 7                           | 789                  |
|                           | SW+D                    | 2556                             | 45                          | 118                  |
|                           | Background <sup>a</sup> | 2604                             | 395                         | 13                   |
|                           | G'                      | 2671                             | 54                          | 98                   |
|                           | D+G                     | 2923                             | 56                          | 95                   |
|                           | 2D'                     | 3206                             | 46                          | 116                  |
| <b>NPG</b><br>(stacked)   | SW                      | 1113                             | 52                          | 102                  |
|                           | D                       | 1330                             | 21                          | 257                  |
|                           | G                       | 1575                             | 22                          | 239                  |
|                           | D'                      | 1611                             | 12                          | 436                  |
|                           | SW+D                    | 2444                             | 26                          | 202                  |
|                           | G'                      | 2653                             | 35                          | 150                  |
|                           | D+G                     | 2914                             | 40                          | 134                  |
|                           | 2D'                     | 3222                             | 27                          | 200                  |
| <b>ZTC</b><br>(Y-zeolite) | SW                      | 1160                             | 38                          | 36                   |
|                           | D                       | 1304                             | 89                          | 88                   |
|                           | G                       | 1555                             | 32                          | 30                   |
|                           | Substrate               | 1980                             | 162                         | 134                  |
|                           | G'                      | 2664                             | 181                         | 200                  |
|                           | D+G                     | 2893                             | 207                         | 100                  |
|                           | 2D'                     | 3142                             | 52                          | 53                   |

<sup>a</sup> The broad peak at  $2604 \text{ cm}^{-1}$  ( $\Gamma_i = 395 \text{ cm}^{-1}$ ) for **NPC** (stacked) could be the remaining background which cannot be expressed by the polynomial background function.

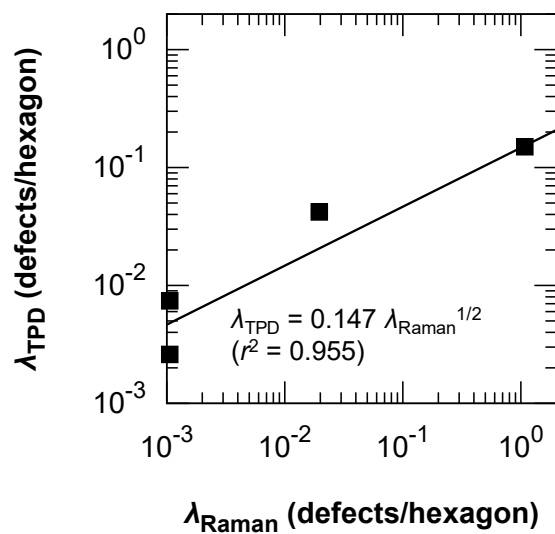

**Figure S5.** Correlation between  $\lambda_{\text{Raman}}$  and  $\lambda_{\text{TPD}}$  for a series of the porous carbon materials.  $r^2$  represents correlation coefficient.



## Transmission Electron Microscopy

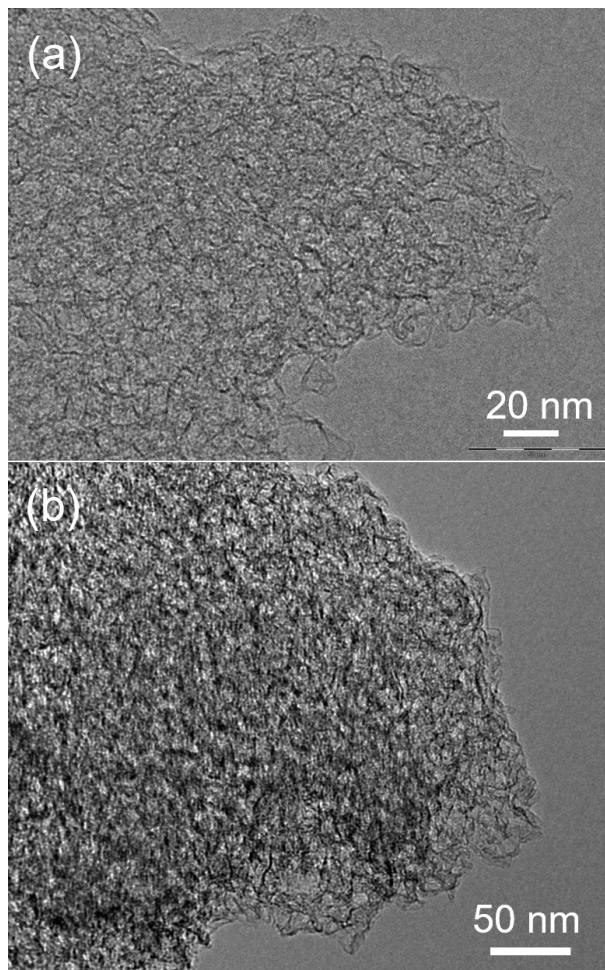

**Figure S6.** TEM images of NPGs synthesized using (a)  $\theta$ -Al<sub>2</sub>O<sub>3</sub> and (b)  $\gamma$ -Al<sub>2</sub>O<sub>3</sub> as the templates.

## References

- S1. M. Yamamoto, S. Goto, R. Tang, K. Nomura, Y. Hayasaka, Y. Yoshioka, M. Ito, M. Morooka, H. Nishihara, T. Kyotani, *ACS Appl. Mater. Interfaces* **2021**, *13*, 38613–38622.
- S2. T. Ishii, S. Kashihara, Y. Hoshikawa, J.-i. Ozaki, N. Kannari, K. Takai, T. Enoki, T. Kyotani, *Carbon* **2014**, *80*, 135-145.
